# Supplementary material
Source: publisher site journal article supplement (https://www.dovepress.com/article/543602)
Supplement: Supplementary file 1 [file 543602%20Appendix%20Table%201.docx]

Appendix Table 1 The MRI lesions of axSpA patients with CRP normal and CRP abnormal [n(%)]

| Variables | AS | | | *P* value | Nr-axSpA | | | *P* value |
| --- | --- | --- | --- | --- | --- | --- | --- | --- |
| total | normal CRP | CRP abnormal | total | normal CRP | CRP abnormal |
| (n=403) | (n=222) | (n=181) | (n=235) | (n=169) | (n=66) |
| BME | 244(60.55) | 129(58.11) | 115(63.54) | 0.268 | 120(51.06) | 80(47.34) | 40(60.61) | 0.068 |
| Erosion | 273(67.74) | 156(70.27) | 117(64.64) | 0.23 | 68(28.94) | 40(23.67) | 28(42.42) | 0.005 |
| Fat metaplasia | 104(25.81) | 55(24.77) | 49(27.07) | 0.601 | 15(6.38) | 8(4.73) | 7(10.61) | 0.099 |
| Backfill | 97(24.07) | 46(20.72) | 51(28.18) | 0.082 | 10(4.26) | 5(2.96) | 5(7.58) | 0.116 |
| Ankylosis | 94(23.33) | 34(15.32) | 60(33.15) | <0.001 | 0 | 0 | 0 | Nil |
| BME+ Erosion | 191(47.39) | 97(43.69) | 94(51.93) | 0.1 | 50(21.28) | 26(15.38) | 24(36.36) | <0.001 |
| BME+ Fat metaplasia | 58(14.39) | 29(13.06) | 29(16.02) | 0.4 | 8(3.40) | 3(1.78) | 5(7.58) | 0.028 |
| BME+ Backfill | 72(17.87) | 33(14.86) | 39(21.55) | 0.082 | 8(3.40) | 3(1.78) | 5(7.58) | 0.028 |

Tested by χ2;BME: bone marrow edema;Nil：non-applicable comparisons
